# Supplementary material for: Synthesis, characterization and anticancer activities of Zn2+, Cu2+, Co2+ and Ni2+ complexes involving chiral amino alcohols
Source: Royal Society of Chemistry journal article supplement (doi:10.1039/d2ra05576g), 2022-01-01
Supplement: d2ra05576g1.pdf [file d2ra05576g1.pdf]

# Supporting Information

## Synthesis, characterizations and Anticancer Activities of Zn<sup>2+</sup>, Cu<sup>2+</sup>, Co<sup>2+</sup> and Ni<sup>2+</sup> Complexes Involving Chiral Amino Alcohols

Q. Umar<sup>a</sup>, Y. H. Huang<sup>a</sup>, A. Nazeer<sup>a</sup>, H. Yin<sup>b</sup>, J. C. Zhang<sup>a</sup>, M. Luo<sup>a\*</sup>, X. G. Meng<sup>c\*</sup>

<sup>a</sup>Department of Chemistry and Chemical Engineering, Hefei University of Technology, Hefei, 23000, P.R. China

<sup>b</sup>Department of Chemistry and Chemical Engineering, Hefei University of Technology, Hefei, 23000, P.R. China

<sup>c</sup>College of Chemistry, Central China Normal University, Wuhan, 430079, P.R. China

Corresponding Author: M. Luo, e-mail: luomei@pku.edu.cn; mengxianggao@ccnu.edu.cn

Q. Umar and Y. H. Huang contributed equally to this work

### Contents of the supporting information:

**Table S1** The selected Bond lengths (Å) and angles (°) for complexes (I) - (VII).

**Table S2** Hydrogen Bond Lengths (Å) and Bond Angles (°) for complexes (I) - (VII).

**Figure S1** The crystal packing of complexes (I)-(VII), showing the formation of the three-dimensional network by hydrogen bonding interactions, (a) for (I), (b) for (II), (c) for (III), (d) for (IV), (e) for (V), (f) for (VI) and (g) for (VII), respectively.

**Figure S2** IR spectra of all the complex (I) - (VII) in the ranges of 4000-500 cm<sup>-1</sup>, showing individual infrared absorption spectrum of each compound.

**Figure S3** UV spectra of complexes (I) - (VII) in the ranges of 200-800 nm, showing individual UV-Vis absorption spectrum of each compound.



**Table S1 Selected bond lengths [Å] and angles [°] for complexes (I) – (VII).**

| <b>Complex (I)</b>   |                 |               |                 |               |                 |
|----------------------|-----------------|---------------|-----------------|---------------|-----------------|
| <b>Ni1-N1</b>        | <b>2.071(4)</b> | <b>Ni1-O1</b> | <b>2.078(3)</b> | <b>Ni1-N2</b> | <b>2.085(4)</b> |
| Ni1-O3               | 2.076(3)        | Ni1-N3        | 2.085(4)        | Ni1-O2        | 2.130(3)        |
| N1-Ni1-O3            | 91.69(16)       | O3-Ni1-N3     | 81.43(14)       | O3-Ni1-N2     | 97.90(14)       |
| N1-Ni1-O1            | 79.95(15)       | O1-Ni1-N3     | 97.75(15)       | O1-Ni1-N2     | 90.69(14)       |
| O3-Ni1-O1            | 171.41(13)      | N1-Ni1-N2     | 164.77(16)      | N3-Ni1-N2     | 94.70(15)       |
| N1-Ni1-N3            | 98.42(16)       | N1-Ni1-O2     | 88.32(15)       | O3-Ni1-O2     | 88.48(14)       |
| O1-Ni1-O2            | 93.19(15)       | N3-Ni1-O2     | 167.99(14)      | N2-Ni1-O2     | 80.17(14)       |
| <b>Complex (II)</b>  |                 |               |                 |               |                 |
| Co1-N1               | 1.931(6)        | Co1-N2        | 1.942(6)        | Co1-N3        | 1.943(6)        |
| Co1-Co2              | 2.644(12)       | Co2-O4        | 2.056(5)        | Co2-O3        | 2.078(5)        |
| Co2-O5               | 2.088(5)        | Co2-O1        | 2.117(5)        | Co2-O6        | 2.127(6)        |
| Co2-O2               | 2.127(5)        | Co2-Co3       | 2.63(13)        | Co3-O4        | 1.897(5)        |
| Co3-O6               | 1.901(6)        | Co3-O5        | 1.908(5)        | Co3-N4        | 1.937(7)        |
| Co3-N5               | 1.940(7)        | Co3-N6        | 1.948(6)        |               |                 |
| O2-Co1-O1            | 85.8(2)         | N3-Co1-Co2    | 121.0(2)        | O3-Co2-Co1    | 46.11(14)       |
| O2-Co1-O3            | 86.3(2)         | O4-Co2-O1     | 177.0(2)        | O5-Co2-Co1    | 135.72(15)      |
| O1-Co1-O3            | 86.7(2)         | O3-Co2-O1     | 77.8(2)         | O1-Co2-Co1    | 45.88(13)       |
| O2-Co1-N1            | 87.1(2)         | O5-Co2-O1     | 105.0(2)        | O4-Co3-N4     | 85.5(3)         |
| O1-Co1-N1            | 93.3(2)         | O4-Co2-O6     | 76.3(2)         | O6-Co3-N4     | 171.0(3)        |
| O3-Co1-N1            | 173.8(2)        | O3-Co2-O6     | 104.5(2)        | O5-Co3-N4     | 92.0(3)         |
| O2-Co1-N2            | 86.5(2)         | O5-Co2-O6     | 75.4(2)         | O4-Co3-N5     | 173.7(3)        |
| O1-Co1-N2            | 172.3(3)        | O1-Co2-O6     | 105.3(2)        | O6-Co3-N5     | 93.5(3)         |
| O3-Co1-N2            | 92.6(2)         | O4-Co2-O2     | 102.9(2)        | O5-Co3-N5     | 87.3(3)         |
| N1-Co1-N2            | 93.6(3)         | O3-Co2-O2     | 76.95(19)       | N4-Co3-N5     | 94.9(3)         |
| O2-Co1-N3            | 172.9(3)        | O5-Co2-O2     | 103.1(2)        | O4-Co3-N6     | 91.6(3)         |
| O1-Co1-N3            | 92.4(3)         | O1-Co2-O2     | 75.64(19)       | O6-Co3-N6     | 87.0(3)         |
| O3-Co1-N3            | 86.7(2)         | O6-Co2-O2     | 178.4(2)        | O5-Co3-N6     | 172.0(3)        |
| N1-Co1-N3            | 93.5(3)         | O4-Co2-Co3    | 45.62(15)       | N4-Co3-N6     | 95.5(3)         |
| N2-Co1-N3            | 95.2(3)         | O3-Co2-Co3    | 132.20(14)      | N5-Co3-N6     | 94.6(3)         |
| O2-Co1-Co2           | 52.76(15)       | O5-Co2-Co3    | 45.84(14)       | O4-Co3-Co2    | 50.79(16)       |
| O1-Co1-Co2           | 52.39(15)       | O1-Co2-Co3    | 137.23(14)      | O6-Co3-Co2    | 52.92(16)       |
| O3-Co1-Co2           | 51.22(15)       | O6-Co2-Co3    | 45.49(15)       | O5-Co3-Co2    | 51.70(16)       |
| N1-Co1-Co2           | 124.1(18)       | O2-Co2-Co3    | 132.99(15)      | N4-Co3-Co2    | 119.0(2)        |
| N2-Co1-Co2           | 121.8(2)        | O4-Co2-Co1    | 131.28(15)      | N5-Co3-Co2    | 124.2(2)        |
| N6-Co3-Co2           | 121.6(2)        | O6-Co2-Co1    | 136.05(16)      | O2-Co2-Co1    | 45.51(14)       |
| <b>Complex (III)</b> |                 |               |                 |               |                 |
| Cu1-O5               | 2.000(3)        | Cu1-O3        | 2.020(2)        | Cu1-O2        | 2.502(3)        |
| Cu1-N2               | 2.003(3)        | Cu1-O1        | 2.493(3)        |               |                 |
| N1-Cu1-O5            | 89.41(10)       | N2-Cu1-O3     | 88.57(11)       | N1-Cu1-O2     | 103.47(11)      |
| N1-Cu1-N2            | 177.33(16)      | N1-Cu1-O1     | 77.88(11)       | O5-Cu1-O2     | 90.10(9)        |
| O5-Cu1-N2            | 92.97(14)       | O5-Cu1-O1     | 91.94(9)        | N2-Cu1-O2     | 77.74(11)       |
| N1-Cu1-O3            | 89.08(14)       | N2-Cu1-O1     | 100.83(11)      | O3-Cu1-O2     | 89.15(9)        |
| O5-Cu1-O3            | 178.11(12)      | O3-Cu1-O1     | 88.86(9)        | O1-Cu1-O2     | 177.57(7)       |
| <b>Complex (IV)</b>  |                 |               |                 |               |                 |
| Cu1-N1               | 1.987(11)       | Cu1-O1S       | 2.770(10)       | Cu2-O2A       | 1.967(9)        |
| Cu1-N2               | 2.007(10)       | Cu2-N1A       | 1.976(12)       | Cu2-O3S       | 2.597(11)       |

|             |          |             |           |             |          |
|-------------|----------|-------------|-----------|-------------|----------|
| Cu1-O1      | 1.954(9) | Cu2-N2A     | 1.986(14) | Cu2-O9S     | 2.71(3)  |
| Cu1-O2      | 1.935(8) | Cu2-O1A     | 1.911(11) |             |          |
| N1-Cu1-N2   | 96.3(4)  | O2-Cu1-N1   | 173.6(4)  | N1A-Cu2-O9S | 96.9(8)  |
| N1-Cu1-O1S  | 84.4(4)  | O2-Cu1-N2   | 86.0(4)   | N2A-Cu2-O3S | 85.6(6)  |
| N2-Cu1-O1S  | 81.1(4)  | O2-Cu1-O1   | 93.3(4)   | N2A-Cu2-O9S | 82.9(11) |
| O1-Cu1-N1   | 85.4(4)  | O2-Cu1-O1S  | 90.1(3)   | O1A-Cu2-N1A | 84.9(5)  |
| O1-Cu1-N2   | 170.6(4) | N1A-Cu2-N2A | 98.3(6)   | O1A-Cu2-N2A | 175.1(7) |
| O1-Cu1-O1S  | 108.3(3) | N1A-Cu2-O3S | 88.4(5)   | O1A-Cu2-O2A | 91.6(5)  |
| O1A-Cu2-O3S | 98.3(4)  | O1A-Cu2-O9S | 93.0(10)  | O2A-Cu2-N1A | 173.5(5) |
| O2A-Cu2-N2A | 85.6(5)  | O2A-Cu2-O3S | 86.8(4)   | O2A-Cu2-O9S | 88.7(8)  |
| O3S-Cu2-O9S | 167.9(8) |             |           |             |          |

**Complex (V)**

|             |            |            |           |             |            |
|-------------|------------|------------|-----------|-------------|------------|
| Zn1-O2      | 2.028(11)  | Zn1-N2     | 2.085(12) | Zn2-Cl3     | 2.227(5)   |
| Zn1-N1      | 2.047(13)  | Zn1-O3     | 2.310(10) | Zn2-Cl1     | 2.283(4)   |
| Zn1-N3      | 2.068(13)  | Zn2-O2     | 1.918(11) | Zn2-Cl2     | 2.345(4)   |
| O2-Zn1-N1   | 109.5(5)   | N1-Zn1-N2  | 122.0(5)  | N3-Zn1-O3   | 73.9(5)    |
| O2-Zn1-N3   | 97.2(5)    | N3-Zn1-N2  | 127.3(5)  | N2-Zn1-O3   | 93.1(4)    |
| N1-Zn1-N3   | 107.6(5)   | O2-Zn1-O3  | 165.5(5)  | O2-Zn2-Cl3  | 114.5(3)   |
| O2-Zn1-N2   | 83.1(4)    | N1-Zn1-O3  | 84.5(5)   | O2-Zn2-Cl1  | 102.0(3)   |
| Cl3-Zn2-Cl1 | 119.37(19) | O2-Zn2-Cl2 | 109.3(4)  | Cl3-Zn2-Cl2 | 110.68(18) |
| Cl1-Zn2-Cl2 | 99.61(16)  |            |           |             |            |

**Complex (VI)**

|             |           |            |           |            |           |
|-------------|-----------|------------|-----------|------------|-----------|
| Co1-O3      | 1.883(9)  | Co1-N1     | 1.946(12) | Co2-O3     | 2.095(10) |
| Co1-O1      | 1.900(10) | Co1-N3     | 1.958(12) | Co2-O5     | 2.111(9)  |
| Co1-O2      | 1.920(10) | Co1-Co2    | 2.650(2)  | Co2-O2     | 2.112(9)  |
| Co1-N2      | 1.937(11) | Co2-O6     | 2.058(8)  | Co2-O1     | 2.113(9)  |
| Co2-O4      | 2.125(9)  | Co2-Co3    | 2.649(2)  | Co3-O6     | 1.882(9)  |
| Co3-N6      | 1.902(11) | Co3-O4     | 1.905(9)  | Co3-O5     | 1.945(8)  |
| Co3-N5      | 1.958(10) | Co3-N4     | 1.988(11) |            |           |
| O3-Co1-O1   | 86.0(4)   | O3-Co1-Co2 | 51.7(3)   | O2-Co2-O1  | 75.8(3)   |
| O3-Co1-O2   | 86.7(4)   | O1-Co1-Co2 | 52.2(3)   | O6-Co2-O4  | 75.9(3)   |
| O1-Co1-O2   | 85.6(4)   | O2-Co1-Co2 | 52.1(3)   | O3-Co2-O4  | 100.5(3)  |
| O3-Co1-N2   | 173.8(5)  | N2-Co1-Co2 | 122.6(4)  | O5-Co2-O4  | 77.4(3)   |
| O1-Co1-N2   | 91.9(5)   | N1-Co1-Co2 | 121.5(3)  | O2-Co2-O4  | 175.6(4)  |
| O2-Co1-N2   | 87.3(4)   | N3-Co1-Co2 | 121.1(4)  | O1-Co2-O4  | 106.9(3)  |
| O3-Co1-N1   | 91.5(4)   | O6-Co2-O3  | 108.0(4)  | O6-Co2-Co3 | 45.0(2)   |
| O1-Co1-N1   | 86.9(4)   | O6-Co2-O5  | 76.3(3)   | O3-Co2-Co3 | 134.6(2)  |
| O2-Co1-N1   | 172.4(5)  | O3-Co2-O5  | 174.7(3)  | O5-Co2-Co3 | 46.5(2)   |
| N2-Co1-N1   | 94.3(5)   | O6-Co2-O2  | 101.7(3)  | O2-Co2-Co3 | 134.8(3)  |
| O3-Co1-N3   | 88.0(4)   | O3-Co2-O2  | 76.7(4)   | O1-Co2-Co3 | 134.5(3)  |
| O1-Co1-N3   | 173.2(4)  | O5-Co2-O2  | 105.7(4)  | O4-Co2-Co3 | 45.4(2)   |
| O2-Co1-N3   | 90.8(5)   | O6-Co2-O1  | 175.2(4)  | O6-Co2-Co1 | 135.3(3)  |
| N2-Co1-N3   | 93.7(5)   | O3-Co2-O1  | 75.6(4)   | O3-Co2-Co1 | 44.9(2)   |
| N1-Co1-N3   | 96.6(5)   | O5-Co2-O1  | 100.3(4)  | O5-Co2-Co1 | 133.9(2)  |
| O2-Co2-Co1  | 45.9(3)   | O6-Co3-N6  | 88.6(4)   | N6-Co3-O5  | 173.2(4)  |
| O1-Co2-Co1  | 45.3(3)   | O6-Co3-O4  | 85.6(3)   | O4-Co3-O5  | 86.9(4)   |
| O4-Co2-Co1  | 133.9(2)  | N6-Co3-O4  | 92.5(4)   | O6-Co3-N5  | 91.6(5)   |
| Co3-Co2-Co1 | 179.29(9) | O6-Co3-O5  | 84.6(4)   | N6-Co3-N5  | 92.9(5)   |
| O4-Co3-N5   | 173.8(4)  | O5-Co3-N5  | 87.3(4)   | O6-Co3-N4  | 171.6(4)  |

|                      |          |            |          |            |          |
|----------------------|----------|------------|----------|------------|----------|
| N6-Co3-N4            | 93.1(5)  | O4-Co3-N4  | 86.1(4)  | O5-Co3-N4  | 93.6(4)  |
| N5-Co3-N4            | 96.6(5)  | O6-Co3-Co2 | 50.6(2)  | N6-Co3-Co2 | 122.8(3) |
| O4-Co3-Co2           | 52.6(3)  | O5-Co3-Co2 | 52.0(3)  | N5-Co3-Co2 | 121.6(4) |
| N4-Co3-Co2           | 122.3(3) |            |          |            |          |
| <b>Complex (VII)</b> |          |            |          |            |          |
| Zn1-N1               | 2.094(6) | Zn1-O3     | 2.191(6) | Zn1-O2     | 2.194(5) |
| Zn1-N3               | 2.101(6) | Zn1-O1     | 2.203(5) | Zn1-N2     | 2.105(6) |
| N1-Zn1-N3            | 98.6(3)  | N2-Zn1-O3  | 94.8(2)  | N1-Zn1-O1  | 78.7(2)  |
| N1-Zn1-N2            | 100.1(2) | N1-Zn1-O2  | 94.5(2)  | N3-Zn1-O1  | 94.2(2)  |
| N3-Zn1-N2            | 99.3(3)  | N3-Zn1-O2  | 166.9(3) | N2-Zn1-O1  | 166.5(2) |
| N1-Zn1-O3            | 165.1(2) | N2-Zn1-O2  | 79.4(2)  | O3-Zn1-O1  | 86.8(2)  |
| N3-Zn1-O3            | 78.8(3)  | O3-Zn1-O2  | 88.2(2)  | O2-Zn1-O1  | 87.2(2)  |

**Table S2** Hydrogen bond lengths (Å) and bond angles (°) for complexes (I) - (VII).

| <b>D-H...A</b>             | <b>d(D-H)</b> | <b>d(H...A)</b> | <b>d(D...A)</b> | <b>∠DHA</b> |
|----------------------------|---------------|-----------------|-----------------|-------------|
| <b>Complex (I)</b>         |               |                 |                 |             |
| O10-H10D...O4              | 0.85(3)       | 2.19(9)         | 2.752(7)        | 123(9)      |
| O11-H11D...O4              | 0.85          | 2.08            | 2.816(6)        | 144.7       |
| O10-H10E...O8              | 0.85          | 2.31            | 3.119(6)        | 159.1       |
| C12-H12...O5 <sup>#1</sup> | 0.98          | 2.57            | 3.517(7)        | 163.8       |
| N3-H3B...O6 <sup>#2</sup>  | 0.97          | 2.41            | 3.273(6)        | 147.6       |
| N3-H3A...O7 <sup>#3</sup>  | 0.97          | 2.32            | 3.258(6)        | 162.6       |
| N2-H2B...O6 <sup>#2</sup>  | 0.97          | 2.18            | 3.065(6)        | 151.8       |
| N2-H2A...O5 <sup>#1</sup>  | 0.97          | 2.22            | 3.128(6)        | 155.0       |
| N1-H1B...O7                | 0.97          | 2.11            | 3.065(6)        | 168.9       |
| N1-H1A...N5 <sup>#3</sup>  | 0.97          | 2.70            | 3.657(7)        | 171.0       |
| N1-H1A...O9 <sup>#3</sup>  | 0.97          | 2.17            | 3.104(6)        | 162.1       |
| O3-H3...O11                | 0.856(12)     | 1.80(2)         | 2.610(5)        | 158(5)      |
| O2-H2...O8                 | 0.870(13)     | 1.92(2)         | 2.767(5)        | 165(4)      |
| O1-H1...O10 <sup>#2</sup>  | 0.848(12)     | 1.766(17)       | 2.608(5)        | 172(6)      |
| O1-H1...O10 <sup>#2</sup>  | 0.848(12)     | 1.766(17)       | 2.608(5)        | 172(6)      |
| O2-H2...O8                 | 0.870(13)     | 1.92(2)         | 2.767(5)        | 165(4)      |
| O3-H3...O11                | 0.856(12)     | 1.80(2)         | 2.610(5)        | 158(5)      |
| N1-H1A...O9 <sup>#3</sup>  | 0.97          | 2.17            | 3.104(6)        | 162.1       |
| N1-H1A...N5 <sup>#3</sup>  | 0.97          | 2.70            | 3.657(7)        | 171.0       |
| N1-H1B...O7                | 0.97          | 2.11            | 3.065(6)        | 168.9       |
| N2-H2A...O5 <sup>#1</sup>  | 0.97          | 2.22            | 3.128(6)        | 155.0       |
| N2-H2B...O6 <sup>#2</sup>  | 0.97          | 2.18            | 3.065(6)        | 151.8       |
| N3-H3A...O7 <sup>#3</sup>  | 0.97          | 2.32            | 3.258(6)        | 162.6       |
| N3-H3B...O6 <sup>#2</sup>  | 0.97          | 2.41            | 3.273(6)        | 147.6       |
| C12-H12...O5 <sup>#1</sup> | 0.98          | 2.57            | 3.517(7)        | 163.8       |
| O10-H10E...O8              | 0.85          | 2.31            | 3.119(6)        | 159.1       |
| O11-H11D...O4              | 0.85          | 2.08            | 2.816(6)        | 144.7       |
| O10-H10D...O4              | 0.85(3)       | 2.19(9)         | 2.752(7)        | 123(9)      |
| O10-H10D...O4              | 0.85(3)       | 2.19(9)         | 2.752(7)        | 123(9)      |

**Complex (III)**

|                             |         |         |          |        |
|-----------------------------|---------|---------|----------|--------|
| N1-H1B...O1 <sup>#1</sup>   | 0.85(3) | 2.21(4) | 3.039(4) | 166(3) |
| N2-H2B...O2 <sup>#2</sup>   | 0.83(3) | 2.30(3) | 3.066(4) | 154(3) |
| N2-H2A...O5 <sup>#2</sup>   | 0.87(3) | 2.64(3) | 3.088(5) | 113(2) |
| C14-H14B...O6 <sup>#1</sup> | 0.98    | 2.43    | 3.374(5) | 160.8  |
| C12-H12A...O4 <sup>#2</sup> | 0.98    | 2.39    | 3.350(4) | 165.8  |
| C8-H8...O5                  | 1.00    | 2.48    | 3.251(4) | 133.5  |
| C6-H6A...O6 <sup>#3</sup>   | 0.99    | 2.52    | 3.502(4) | 171.7  |
| C2-H2C...O3                 | 1.00    | 2.59    | 3.151(4) | 115.6  |
| O2-H2...O4                  | 0.84    | 1.83    | 2.634(3) | 159.0  |
| O1-H1...O6                  | 0.84    | 1.78    | 2.618(3) | 174.0  |
| N1-H1B...O1 <sup>#1</sup>   | 0.85(3) | 2.21(4) | 3.039(4) | 166(3) |
| N2-H2B...O2 <sup>#2</sup>   | 0.83(3) | 2.30(3) | 3.066(4) | 154(3) |
| N2-H2A...O5 <sup>#2</sup>   | 0.87(3) | 2.64(3) | 3.088(5) | 113(2) |
| C14-H14B...O6 <sup>#1</sup> | 0.98    | 2.43    | 3.374(5) | 160.8  |
| C12-H12A...O4 <sup>#2</sup> | 0.98    | 2.39    | 3.350(4) | 165.8  |
| C8-H8...O5                  | 1.00    | 2.48    | 3.251(4) | 133.5  |
| C6-H6A...O6 <sup>#3</sup>   | 0.99    | 2.52    | 3.502(4) | 171.7  |
| C2-H2C...O3                 | 1.00    | 2.59    | 3.151(4) | 115.6  |
| O2-H2...O4                  | 0.84    | 1.83    | 2.634(3) | 159.0  |
| O1-H1...O6                  | 0.84    | 1.78    | 2.618(3) | 174.0  |
| O1-H1...O6                  | 0.84    | 1.78    | 2.618(3) | 174.0  |
| O2-H2...O4                  | 0.84    | 1.83    | 2.634(3) | 159.0  |
| C2-H2C...O3                 | 1.00    | 2.59    | 3.151(4) | 115.6  |
| C6-H6A...O6 <sup>#3</sup>   | 0.99    | 2.52    | 3.502(4) | 171.7  |
| C8-H8...O5                  | 1.00    | 2.48    | 3.251(4) | 133.5  |
| C12-H12A...O4 <sup>#2</sup> | 0.98    | 2.39    | 3.350(4) | 165.8  |
| C14-H14B...O6 <sup>#1</sup> | 0.98    | 2.43    | 3.374(5) | 160.8  |
| N2-H2A...O5 <sup>#2</sup>   | 0.87(3) | 2.64(3) | 3.088(5) | 113(2) |
| N2-H2B...O2 <sup>#2</sup>   | 0.83(3) | 2.30(3) | 3.066(4) | 154(3) |
| N1-H1B...O1 <sup>#1</sup>   | 0.85(3) | 2.21(4) | 3.039(4) | 166(3) |
| O1-H1...O6                  | 0.84    | 1.78    | 2.618(3) | 174.0  |
| O2-H2...O4                  | 0.84    | 1.83    | 2.634(3) | 159.0  |
| C2-H2C...O3                 | 1.00    | 2.59    | 3.151(4) | 115.6  |
| C6-H6A...O6 <sup>#3</sup>   | 0.99    | 2.52    | 3.502(4) | 171.7  |
| C8-H8...O5                  | 1.00    | 2.48    | 3.251(4) | 133.5  |
| C12-H12A...O4 <sup>#2</sup> | 0.98    | 2.39    | 3.350(4) | 165.8  |
| C14-H14B...O6 <sup>#1</sup> | 0.98    | 2.43    | 3.374(5) | 160.8  |
| N2-H2A...O5 <sup>#2</sup>   | 0.87(3) | 2.64(3) | 3.088(5) | 113(2) |
| N2-H2B...O2 <sup>#2</sup>   | 0.83(3) | 2.30(3) | 3.066(4) | 154(3) |
| N1-H1B...O1 <sup>#1</sup>   | 0.85(3) | 2.21(4) | 3.039(4) | 166(3) |

**Complex (IV)**

|                            |      |      |           |       |
|----------------------------|------|------|-----------|-------|
| N1-H1A...O4S <sup>#1</sup> | 0.91 | 2.19 | 3.015(15) | 150.8 |
| N1-H1B...O2 <sup>#2</sup>  | 0.91 | 1.98 | 2.880(14) | 169.6 |

|                              |           |          |           |         |
|------------------------------|-----------|----------|-----------|---------|
| N2-H2A...O1 <sup>#2</sup>    | 0.91      | 2.03     | 2.925(13) | 166.5   |
| N2-H2A...O1S                 | 0.91      | 2.72     | 3.158(14) | 110.6   |
| O1-H1...O1A                  | 0.84      | 1.73     | 2.429(14) | 139.0   |
| N1A-H1AA...O6S               | 0.91      | 2.31     | 3.02(3)   | 135.1   |
| N2A-H2AB...O9S               | 0.91      | 2.72     | 3.16(4)   | 110.6   |
| N2A-H2AC...O5S               | 0.91      | 2.26     | 3.16(3)   | 176.0   |
| O2A-H2AD...O2                | 0.877(14) | 2.05(15) | 2.445(13) | 106(12) |
| O9S-H9SB...O6S <sup>#3</sup> | 0.87      | 2.38     | 3.15(4)   | 148.7   |

**Complex (V)**

|                             |           |         |           |         |
|-----------------------------|-----------|---------|-----------|---------|
| C24-H24B...O1 <sup>#1</sup> | 0.98      | 2.43    | 3.338(18) | 153.4   |
| C23-H23...C11 <sup>#1</sup> | 0.99      | 2.75    | 3.576(17) | 141.9   |
| C7-H7...C13 <sup>#2</sup>   | 0.99      | 2.83    | 3.782(16) | 161.8   |
| N3-H3B...C12                | 0.98      | 2.77    | 3.567(13) | 138.8   |
| N3-H3B...C11                | 0.98      | 2.83    | 3.512(13) | 127.4   |
| N3-H3A...C12 <sup>#3</sup>  | 0.98      | 2.43    | 3.338(12) | 153.1   |
| N2-H2B...C13 <sup>#2</sup>  | 0.98      | 2.69    | 3.613(13) | 156.2   |
| N1-H1B...C11                | 0.98      | 2.46    | 3.295(13) | 142.8   |
| N1-H1A...C11 <sup>#1</sup>  | 0.98      | 2.48    | 3.418(12) | 160.4   |
| O3-H3...C12 <sup>#2</sup>   | 0.866(13) | 2.49(9) | 3.221(11) | 142(12) |
| O1-H1...C12 <sup>#1</sup>   | 0.83      | 2.53    | 3.281(12) | 150.5   |
| O1-H1...C12 <sup>#1</sup>   | 0.83      | 2.53    | 3.281(12) | 150.5   |
| O3-H3...C12 <sup>#2</sup>   | 0.866(13) | 2.49(9) | 3.221(11) | 142(12) |
| N1-H1A...C11 <sup>#1</sup>  | 0.98      | 2.48    | 3.418(12) | 160.4   |
| N1-H1B...C11                | 0.98      | 2.46    | 3.295(13) | 142.8   |
| N2-H2B...C13 <sup>#2</sup>  | 0.98      | 2.69    | 3.613(13) | 156.2   |
| N3-H3A...C12 <sup>#3</sup>  | 0.98      | 2.43    | 3.338(12) | 153.1   |
| N3-H3B...C11                | 0.98      | 2.83    | 3.512(13) | 127.4   |
| N3-H3B...C12                | 0.98      | 2.77    | 3.567(13) | 138.8   |
| C7-H7...C13 <sup>#2</sup>   | 0.99      | 2.83    | 3.782(16) | 161.8   |
| C23-H23...C11 <sup>#1</sup> | 0.99      | 2.75    | 3.576(17) | 141.9   |
| C24-H24B...O1 <sup>#1</sup> | 0.98      | 2.43    | 3.338(18) | 153.4   |

**Complex (VII)**

|                            |           |         |          |        |
|----------------------------|-----------|---------|----------|--------|
| N3-H3B...C12 <sup>#1</sup> | 0.97      | 2.63    | 3.456(8) | 143.4  |
| N3-H3A...C11 <sup>#2</sup> | 0.97      | 2.46    | 3.378(7) | 157.3  |
| N2-H2B...C12 <sup>#1</sup> | 0.97      | 2.51    | 3.361(7) | 145.9  |
| N2-H2A...C11               | 0.97      | 2.42    | 3.334(7) | 157.2  |
| N1-H1B...C12 <sup>#1</sup> | 0.97      | 2.40    | 3.268(7) | 148.7  |
| N1-H1A...C12               | 0.97      | 2.37    | 3.296(7) | 159.9  |
| O3-H3...C11                | 0.863(13) | 2.56(8) | 3.057(6) | 118(7) |
| O2-H2...C12                | 0.867(13) | 2.43(6) | 3.058(6) | 130(6) |
| O1-H1...C11 <sup>#2</sup>  | 0.860(13) | 2.53(7) | 3.071(7) | 122(7) |
| O1-H1...C11 <sup>#2</sup>  | 0.860(13) | 2.53(7) | 3.071(7) | 122(7) |
| O2-H2...C12                | 0.867(13) | 2.43(6) | 3.058(6) | 130(6) |
| O3-H3...C11                | 0.863(13) | 2.56(8) | 3.057(6) | 118(7) |

|                            |      |      |          |       |
|----------------------------|------|------|----------|-------|
| N1-H1A...Cl2               | 0.97 | 2.37 | 3.296(7) | 159.9 |
| N1-H1B...Cl2 <sup>#1</sup> | 0.97 | 2.40 | 3.268(7) | 148.7 |
| N2-H2A...Cl1               | 0.97 | 2.42 | 3.334(7) | 157.2 |
| N2-H2B...Cl2 <sup>#1</sup> | 0.97 | 2.51 | 3.361(7) | 145.9 |
| N3-H3A...Cl1 <sup>#2</sup> | 0.97 | 2.46 | 3.378(7) | 157.3 |
| N3-H3B...Cl2 <sup>#1</sup> | 0.97 | 2.63 | 3.456(8) | 143.4 |

Symmetry transformations used to generate equivalent atoms: For (I), #1 =  $x + 1/2, -y + 3/2, -z + 1$ ; #2 =  $x + 1, y, z$ ; #3 =  $x + 1/2, -y + 1/2, -z + 1$ . For (III), #1 =  $x + 1, y, z$ ; #2 =  $x - 1, y, z$ ; #3 =  $x, y, z - 1$ . For (IV), #1 =  $x + 1/2, -y + 3/2, -z + 1$ ; #2 =  $x - 1/2, -y + 3/2, -z + 1$ ; #3 =  $x + 1, y, z$ . For (V), #1 =  $-x + 2, y - 1/2, -z + 1$ ; #2 =  $x, y - 1, z$ ; #3 =  $-x + 1, y - 1/2, -z + 1$ . For (VII), #1 =  $x + 1/2, -y + 3/2, -z + 1$ ; #2 =  $-x + 1, y + 1/2, -z + 1/2$ .

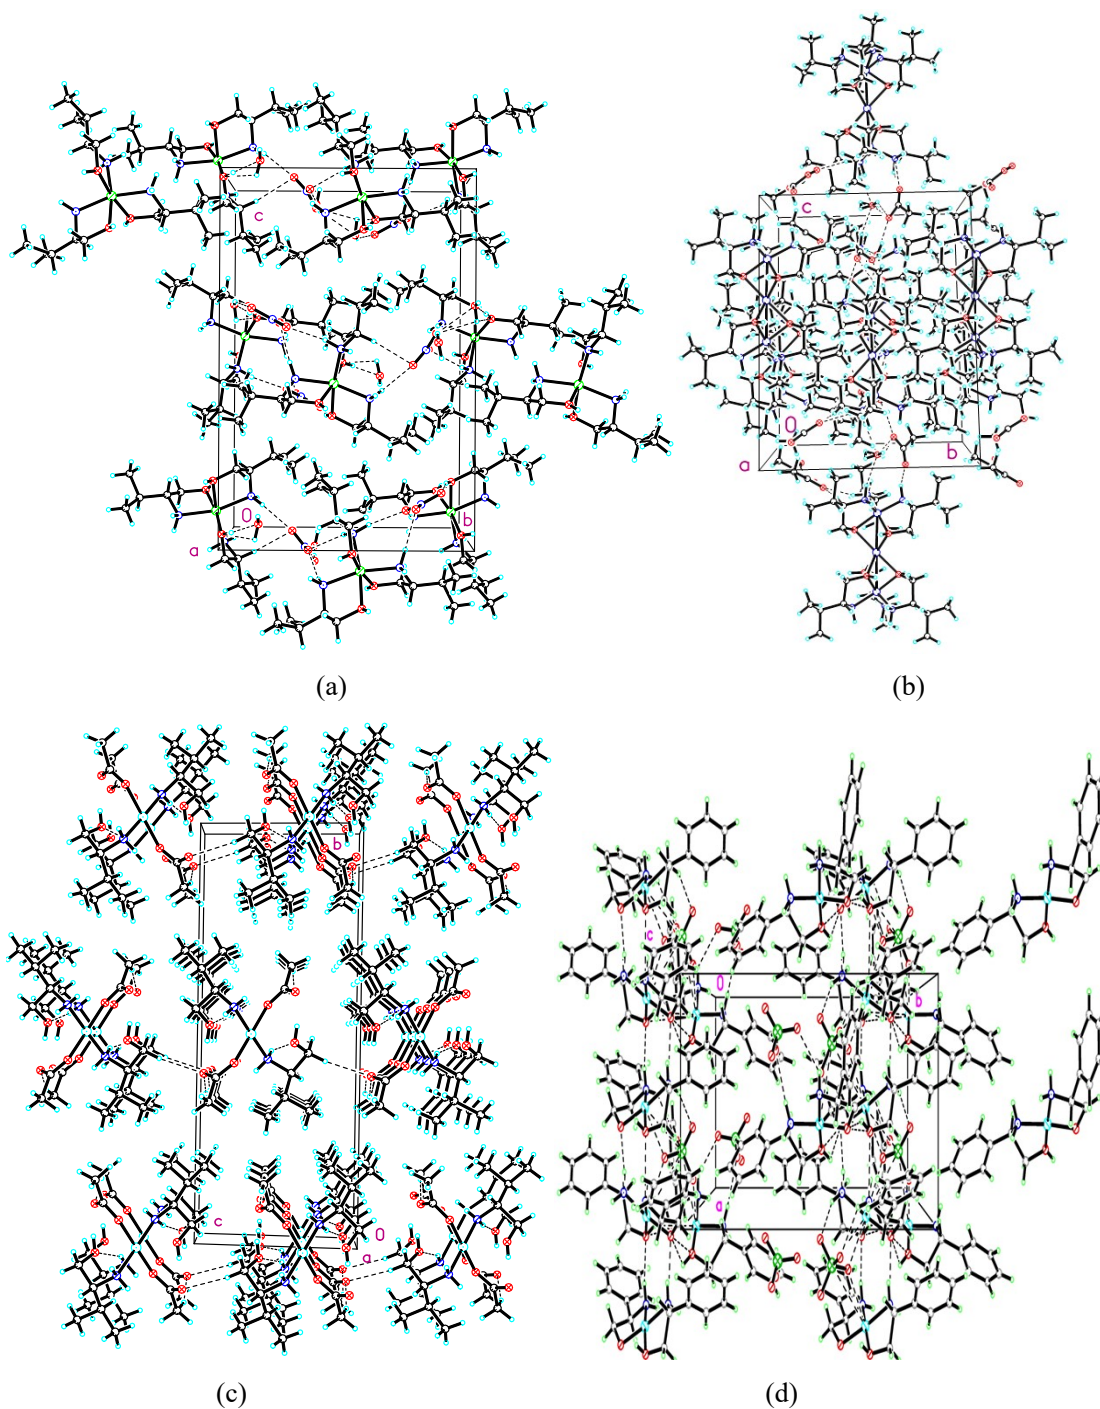



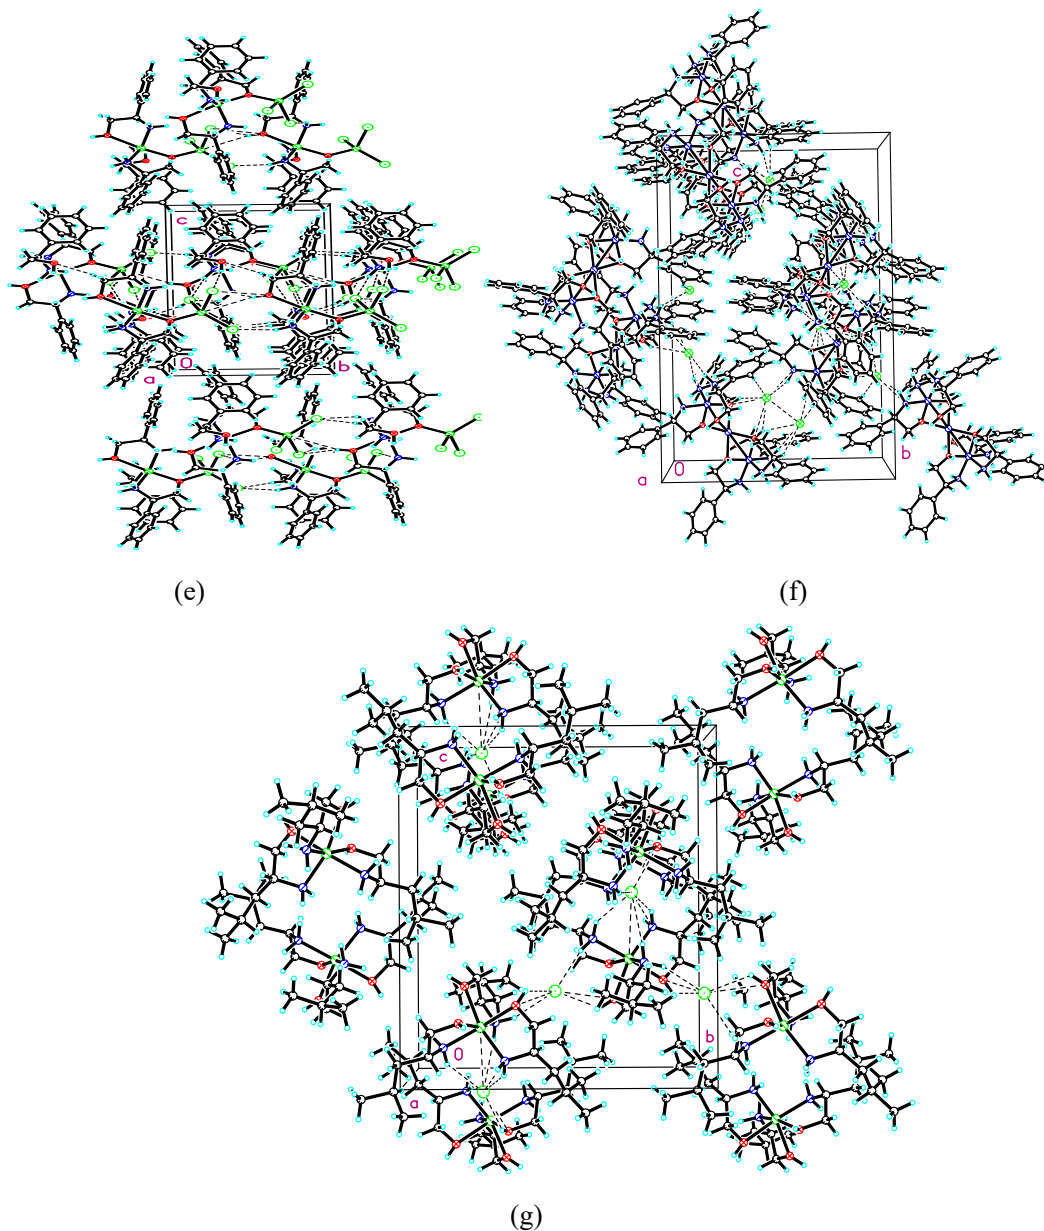

Figure S1 The crystal packing of complexes (I) – (VII), showing the formation of the three-dimensional network by hydrogen bonding interactions, (a) for (I), (b) for (II), (c) for (III), (d) for (IV), (e) for (V), (f) for (VI) and (g) for (VII), respectively.

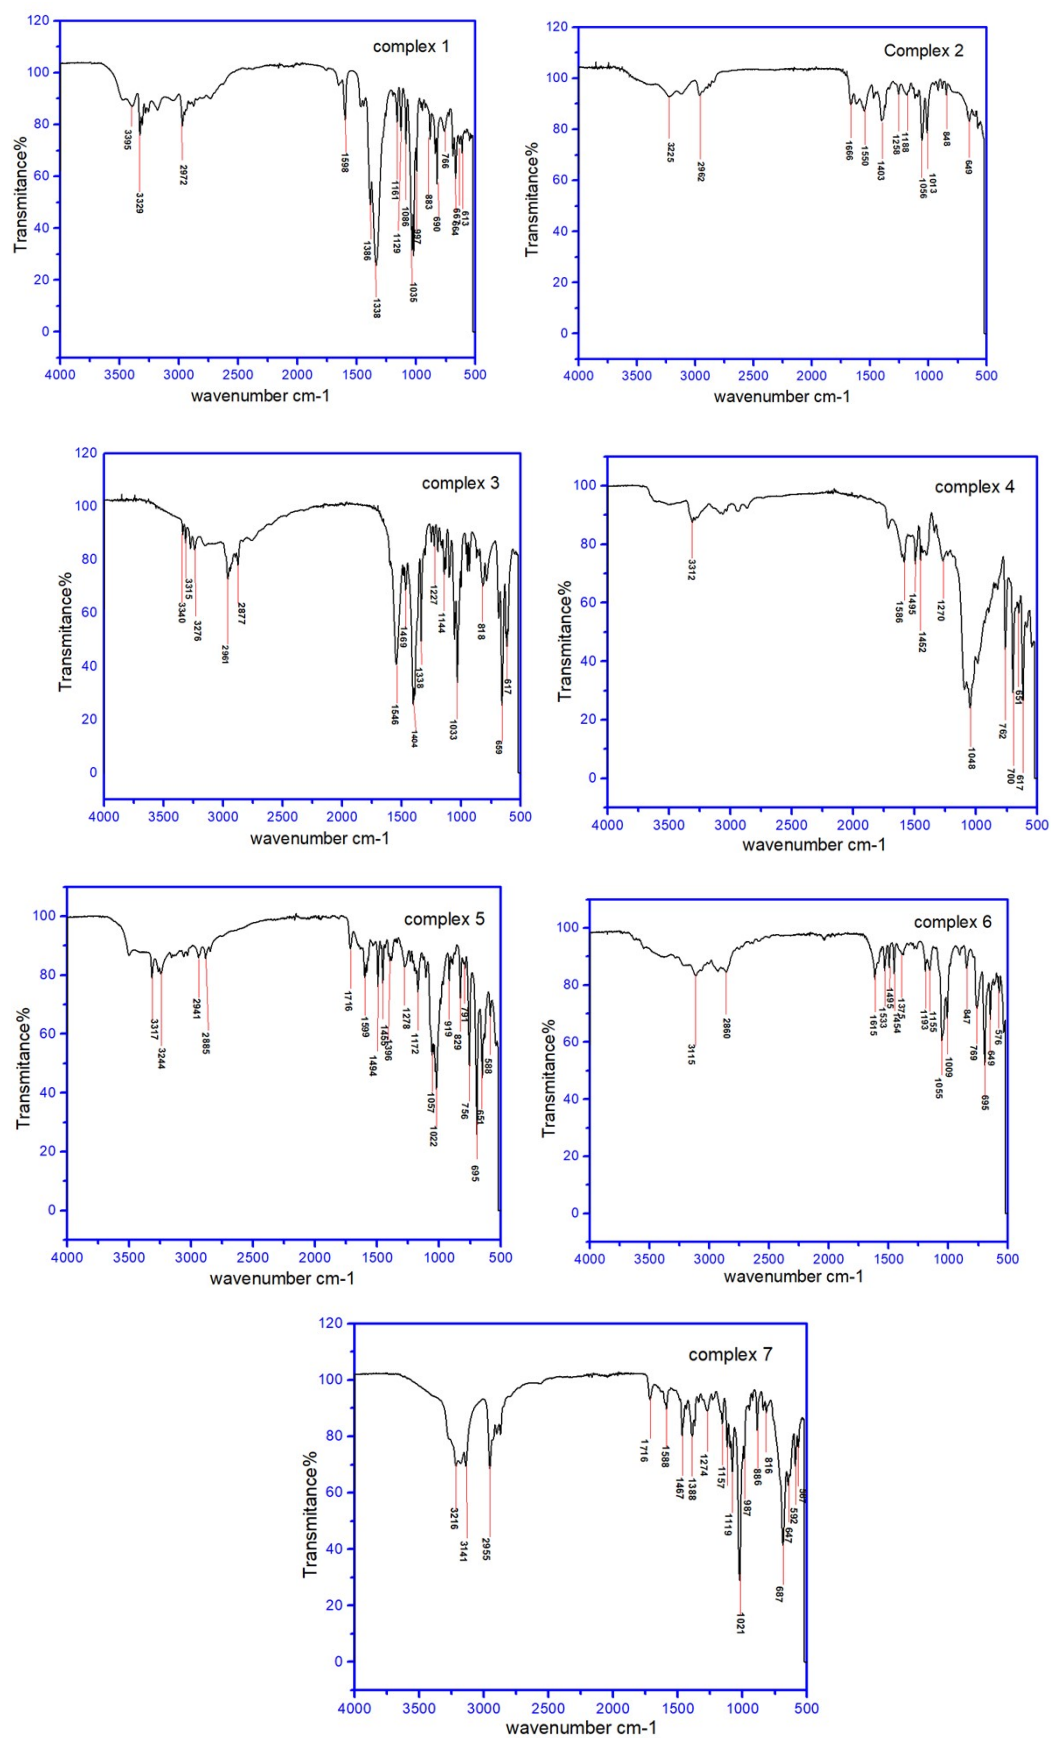

Figure S2 IR spectrums of complexes (I) - (VII).

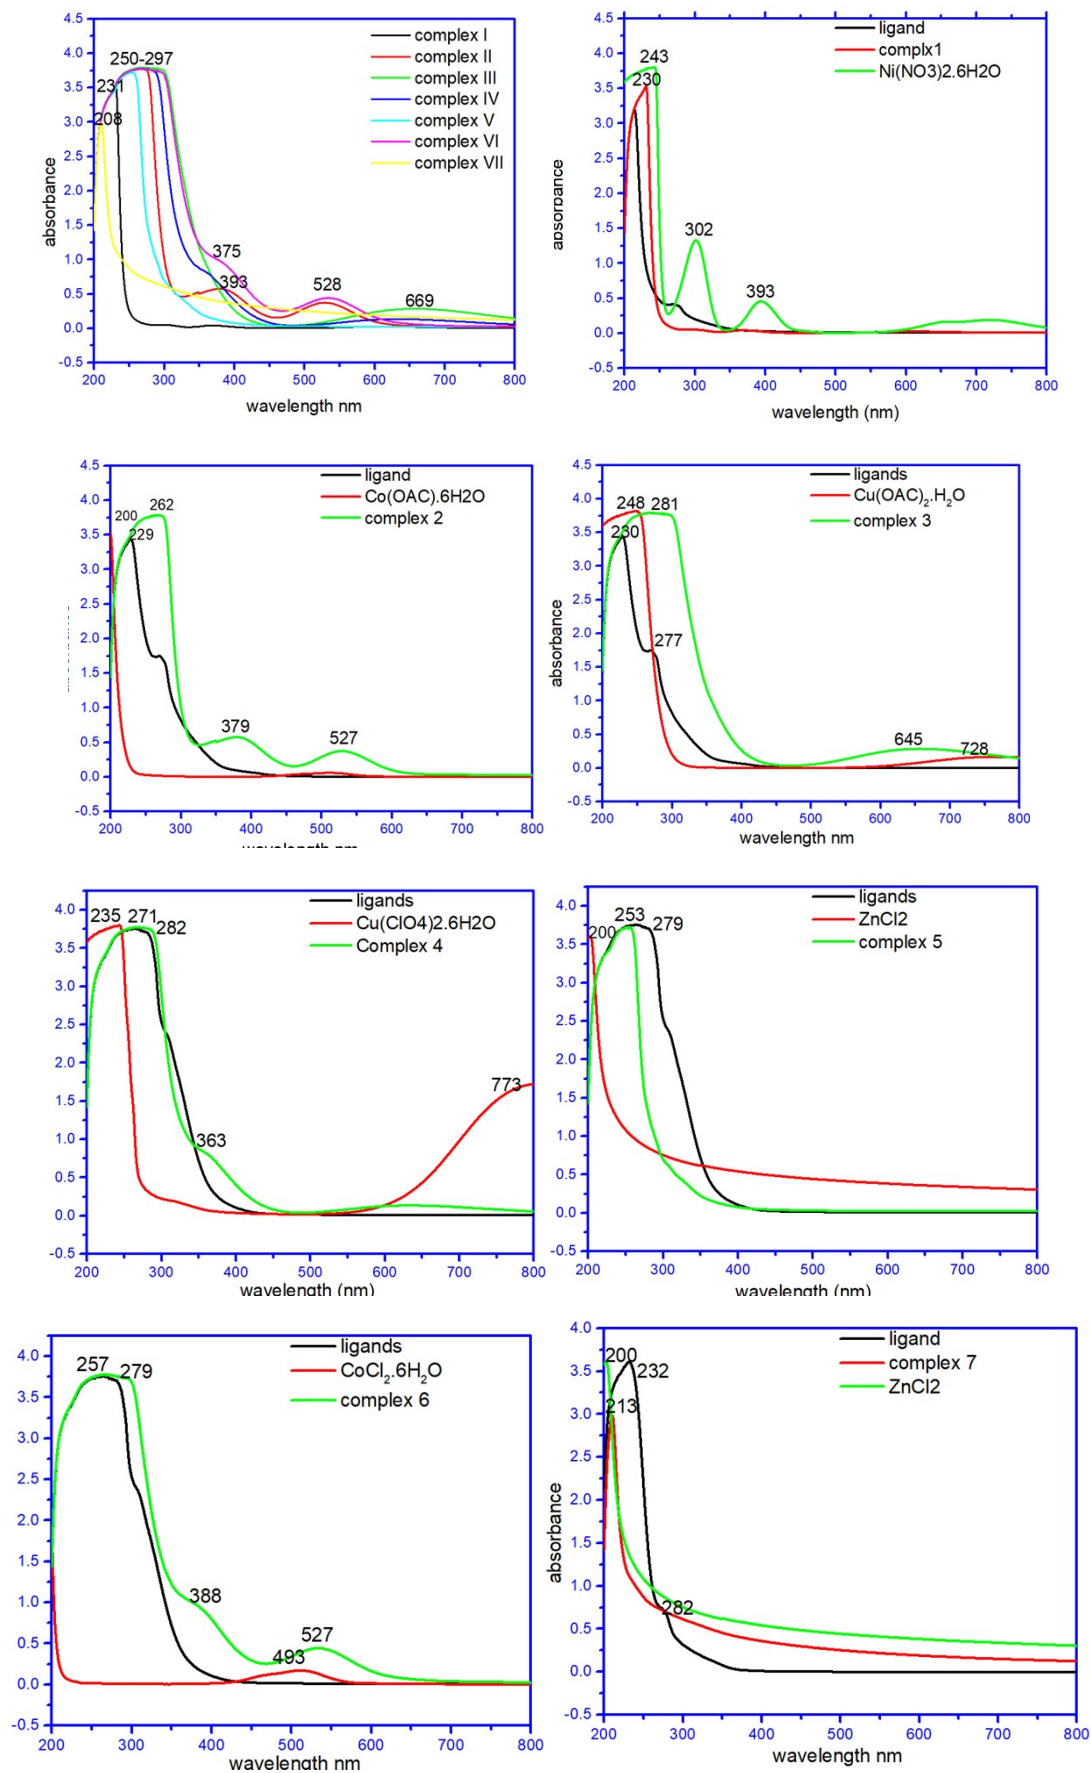

**Figure S3** UV spectrum of complexes (I) - (VII).
